# Supplementary material for: Fast assembling microarrays of superparamagnetic Fe3O4@Au nanoparticle clusters as reproducible substrates for surface-enhanced Raman scattering
Source: Royal Society of Chemistry journal article supplement (doi:10.1039/c5nr02491a), 2015-01-01
Supplement: c5nr02491a1.pdf [file c5nr02491a1.pdf]

## **Electronic Supplementary information**

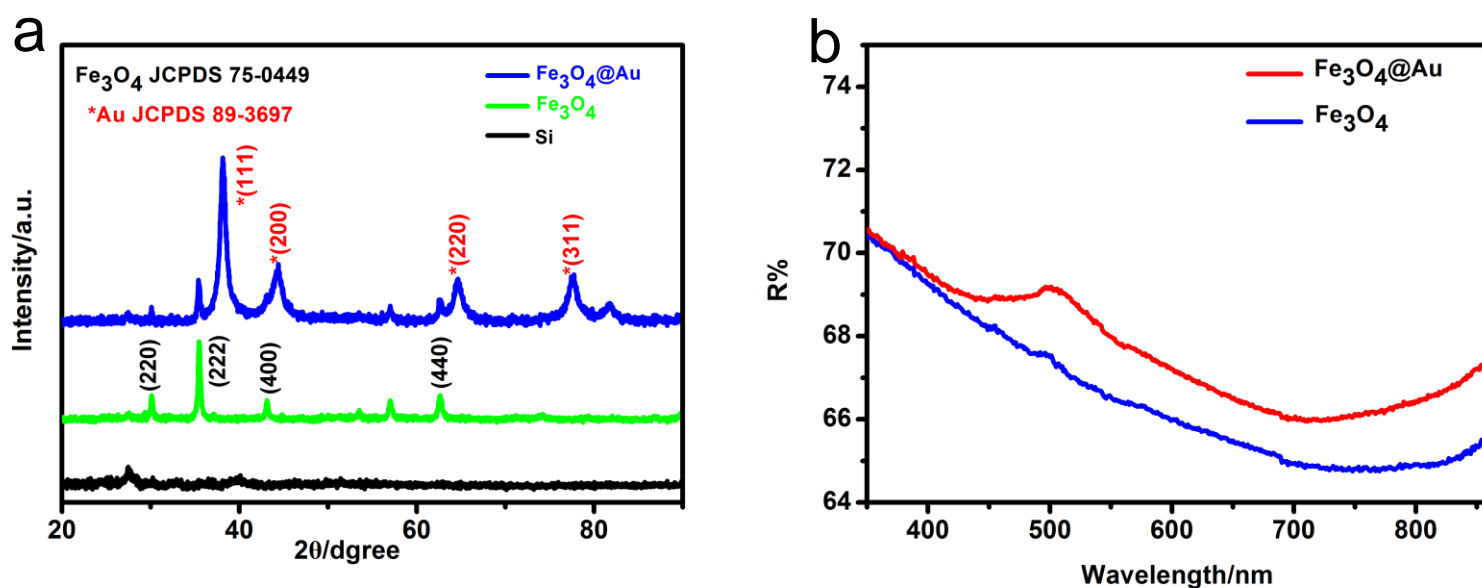

**Figure S1.** a) XRD patterns of prepared Fe<sub>3</sub>O<sub>4</sub> NPs (green curve), Fe<sub>3</sub>O<sub>4</sub>@Au NCs (blue curve) and the silicon substrate (black curve, control substrate for XRD) . b) Reflection spectra of the Fe<sub>3</sub>O<sub>4</sub> NPs and Fe<sub>3</sub>O<sub>4</sub>@Au NCs in aqueous solutions.

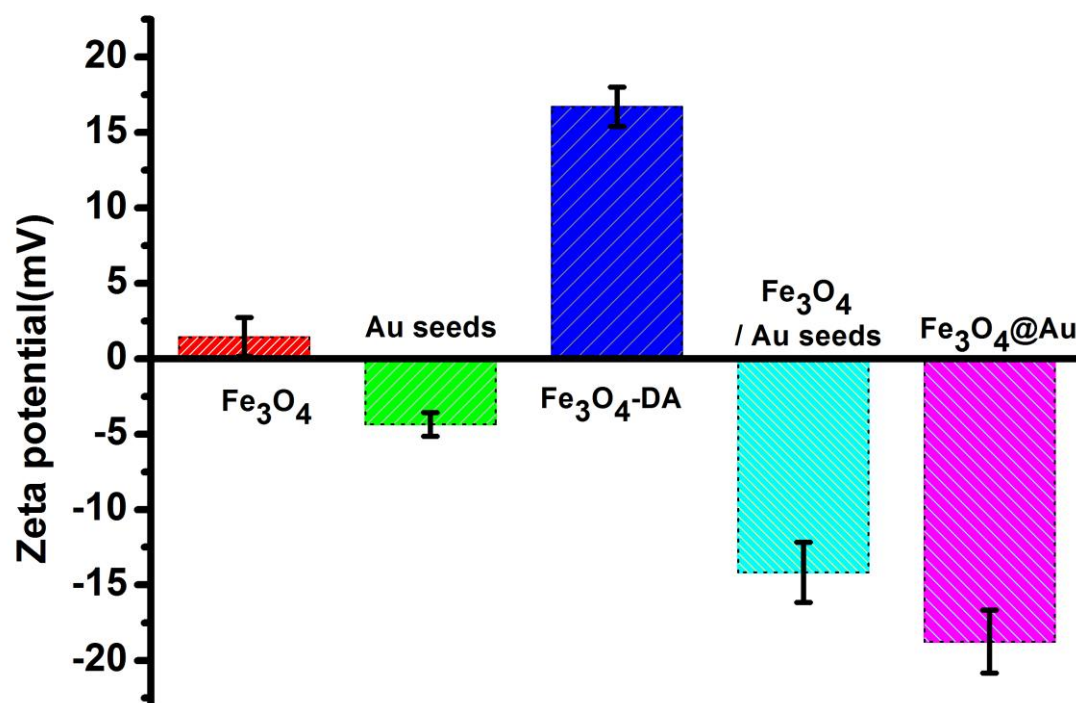

**Figure S2.** Measurements of Zeta potential of intermediate and final products during the synthesis, error bar : standard deviation (n=3).

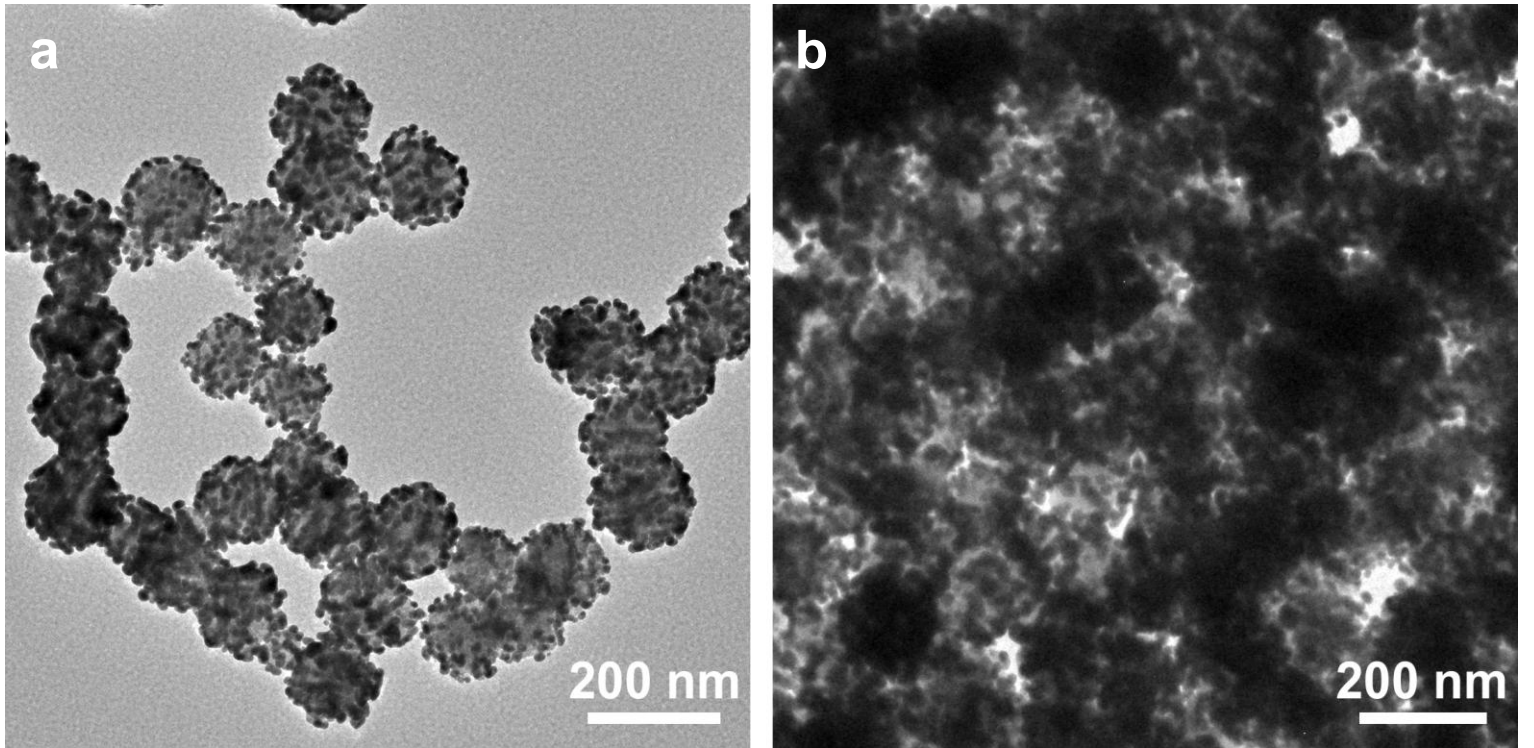

**Figure S3.** TEM images of  $\text{Fe}_3\text{O}_4@Au$  NCs without a) or with b) the external magnetic field.

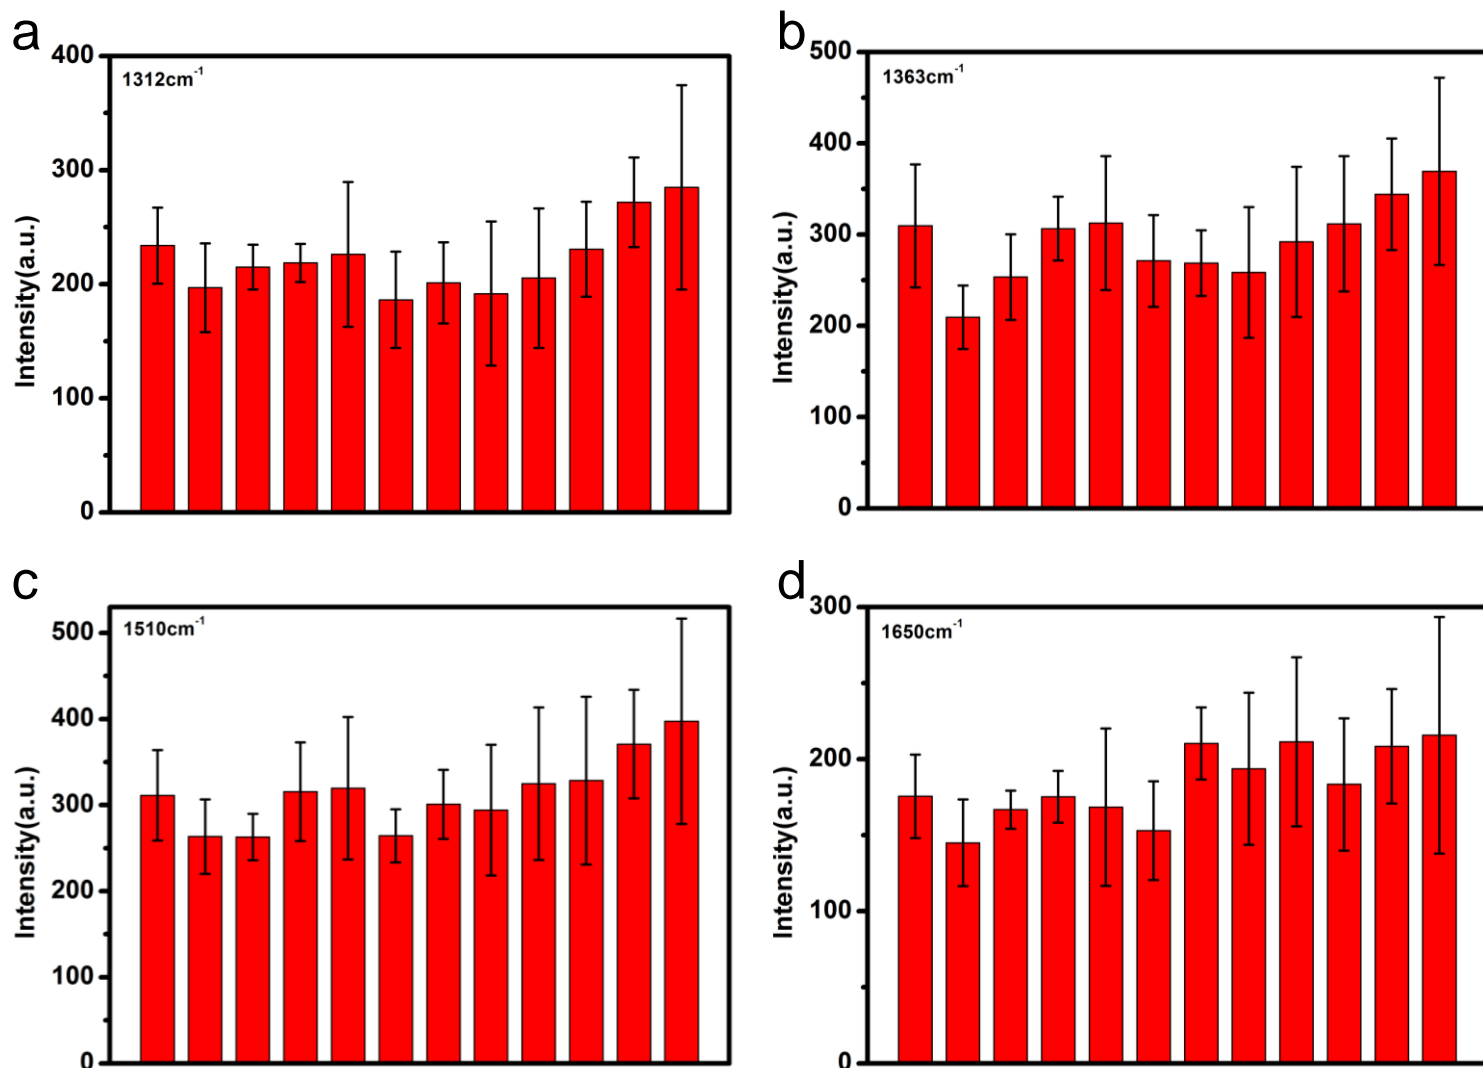

**Figure S4.** Reproducibility of the SERS signals using the silicon-based substrates from different batches, including 12 separate substrate samples, error bar: standard deviation showing well-to-well variations ( $n=5$ ), R6G ( $1 \times 10^{-6}\text{M}$ ).

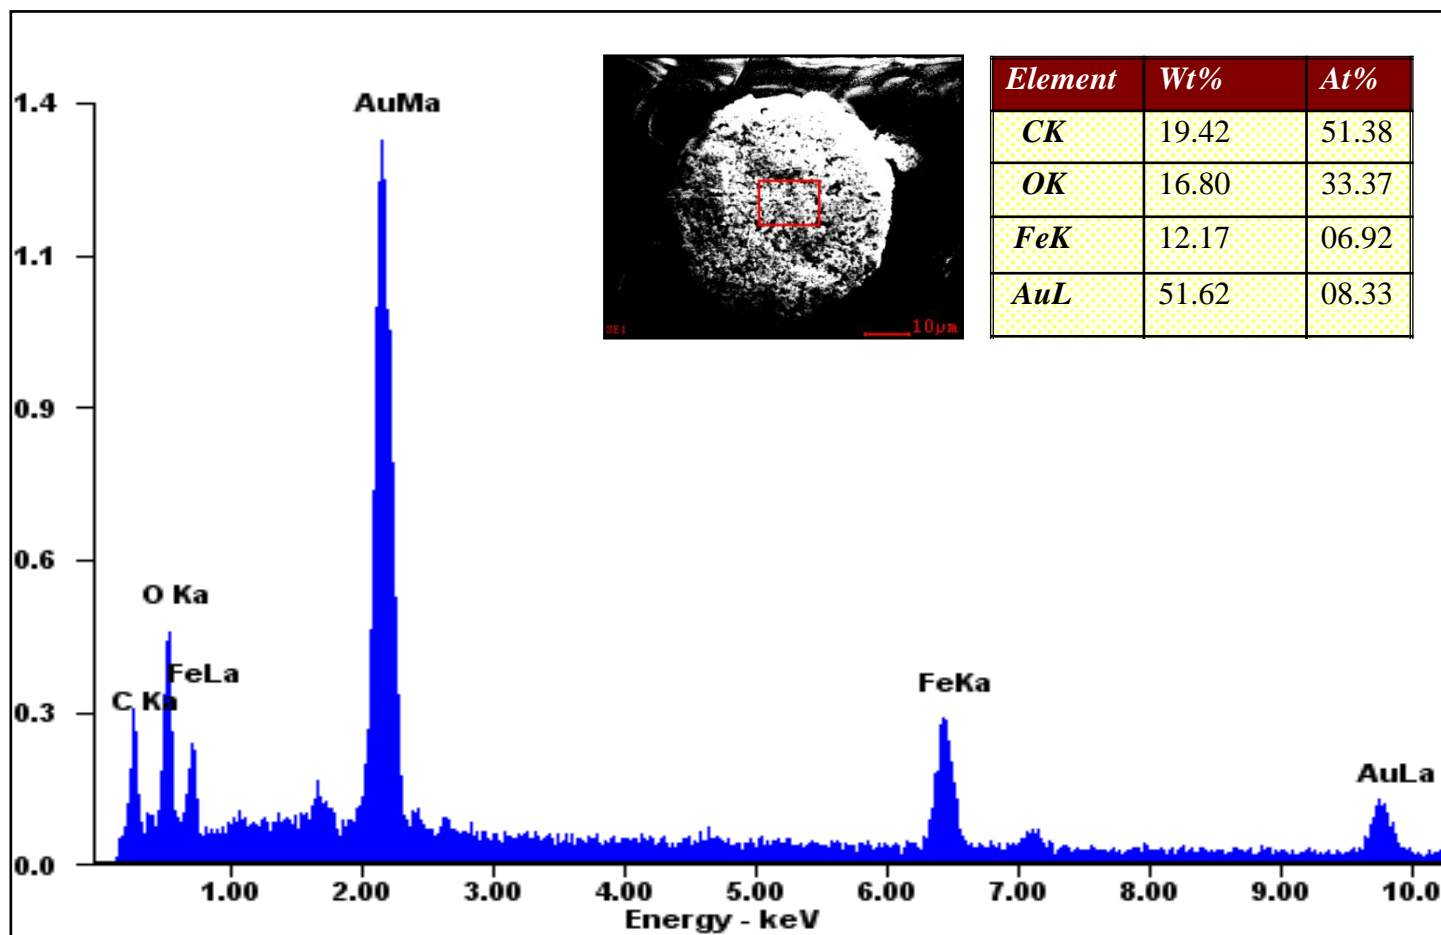

**Figure S5.** The EDS analysis of Fe<sub>3</sub>O<sub>4</sub>@Au NCs on the PAM hydrogel-based substrates, with the insets showing the transfer and the aggregation morphology of Fe<sub>3</sub>O<sub>4</sub>@Au NCs on a single PAM hydrogel micropillar (left), the composition and ratios of the main elements of the PAM hydrogel-based substrates (right).

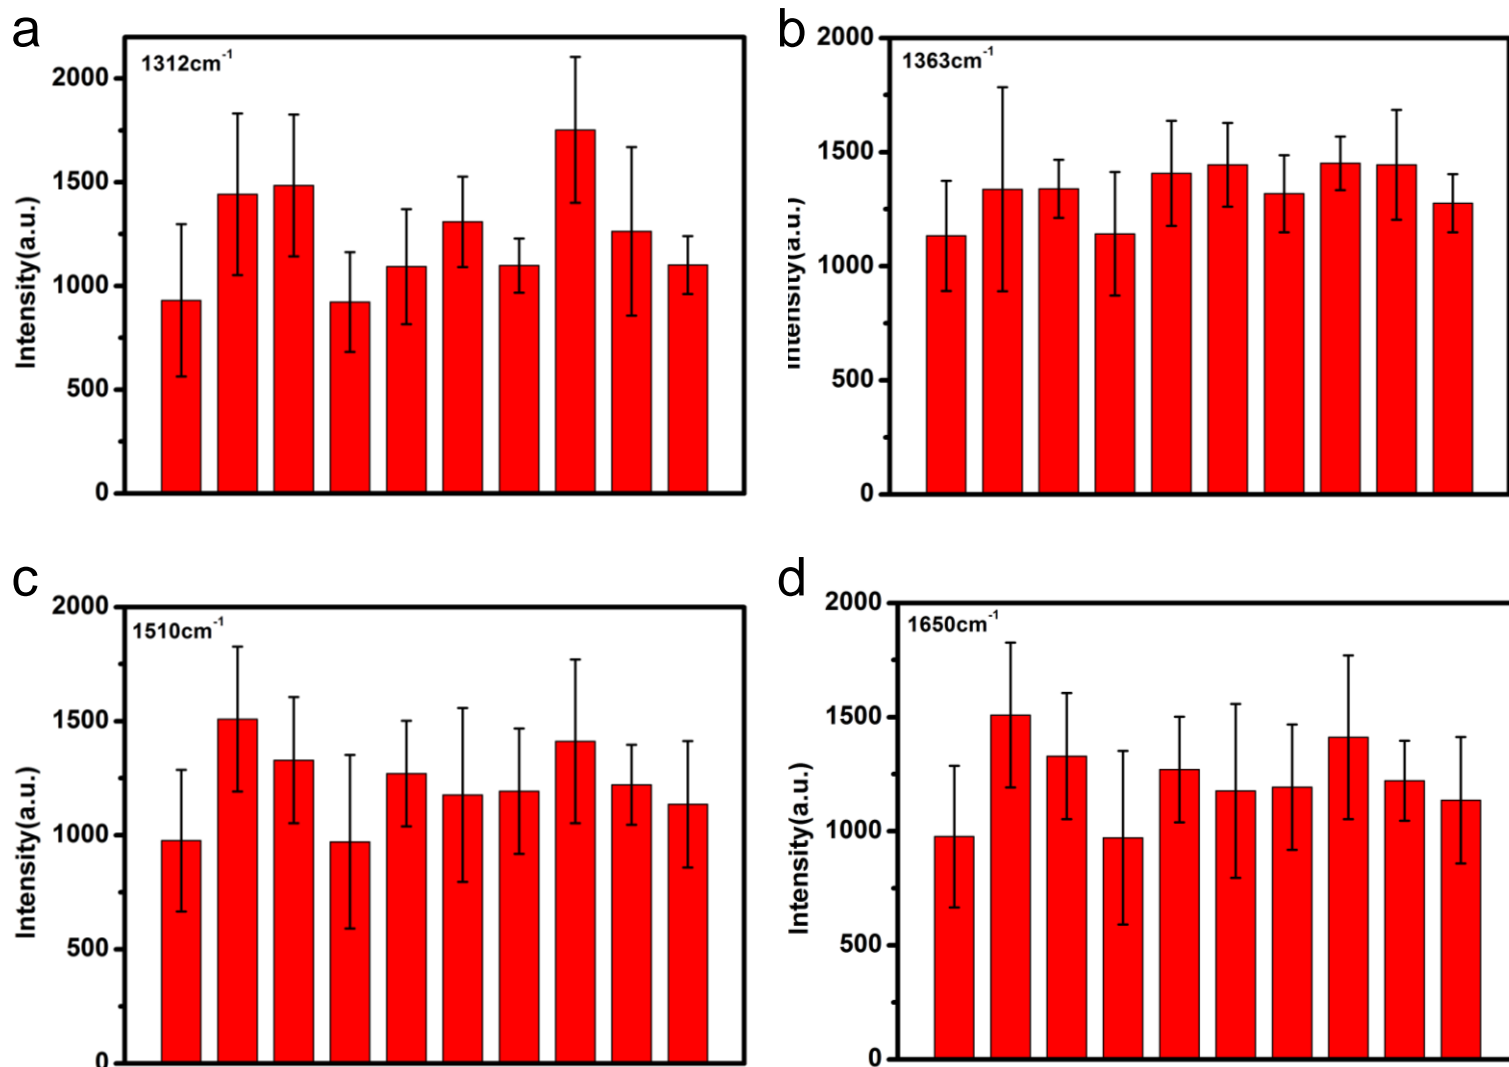

**Figure S6.** Reproducibility of the SERS signals using the PAM hydrogel-based substrates from different batches, including 10 separate substrate samples, error bar: standard deviation showing well-to-well variations ( $n=5$ ), R6G ( $1 \times 10^{-5}$  M).

**Table 1.** Enhancement factors (EF) of different substrates for R6G.

|                          | 1312 cm <sup>-1</sup> | 1363 cm <sup>-1</sup> | 1510 cm <sup>-1</sup> | 1650 cm <sup>-1</sup> |
|--------------------------|-----------------------|-----------------------|-----------------------|-----------------------|
| Silicon-based substrate  | $7.45 \times 10^6$    | $7.12 \times 10^6$    | $4.95 \times 10^6$    | $3.46 \times 10^6$    |
| Hydrogel-based substrate | $1.87 \times 10^6$    | $1.03 \times 10^6$    | $1.03 \times 10^6$    | $0.59 \times 10^6$    |
| Control <sup>1</sup>     | $1.59 \times 10^4$    | $1.63 \times 10^4$    | $1.28 \times 10^4$    | $1.03 \times 10^4$    |
| Control <sup>2</sup>     | $2.52 \times 10^4$    | $3.25 \times 10^4$    | $2.61 \times 10^4$    | $1.77 \times 10^4$    |
| Control <sup>3</sup>     | $1.66 \times 10^4$    | $2.54 \times 10^4$    | $2.38 \times 10^4$    | $1.43 \times 10^4$    |
| Control <sup>4</sup>     | $1.57 \times 10^5$    | $1.52 \times 10^5$    | $1.42 \times 10^5$    | $1.32 \times 10^5$    |

**Table 2.** Relative standard deviation (RSD) of different substrates for R6G.

|                          | 1312 cm <sup>-1</sup> | 1363 cm <sup>-1</sup> | 1510 cm <sup>-1</sup> | 1650 cm <sup>-1</sup> |
|--------------------------|-----------------------|-----------------------|-----------------------|-----------------------|
| Silicon-based substrate  | 13.7%                 | 14.7%                 | 13.2%                 | 13.0%                 |
| Hydrogel-based substrate | 16.6%                 | 14.8%                 | 16.8%                 | 19.2%                 |
| Control <sup>1</sup>     | 82.3%                 | 74.9%                 | 79.3%                 | 87.3%                 |
| Control <sup>2</sup>     | 51.4%                 | 46.5%                 | 34.9%                 | 43.4%                 |
| Control <sup>3</sup>     | 59.7%                 | 61.9%                 | 64.2%                 | 61.2%                 |
| Control <sup>4</sup>     | 68.9%                 | 68.2%                 | 67.7%                 | 66.9%                 |

Note:

control<sup>1</sup>: Fe<sub>3</sub>O<sub>4</sub>@Au NCs deposited into the micro-wells without a magnet.

control<sup>2</sup>: Fe<sub>3</sub>O<sub>4</sub>@Au NCs deposited on the smooth wafer with a magnet.

control<sup>3</sup>: Fe<sub>3</sub>O<sub>4</sub>@Au NCs deposited on the smooth wafer without a magnet.

control<sup>4</sup>: A monolayer of Fe<sub>3</sub>O<sub>4</sub>@Au NCs deposited on the smooth wafer without a magnet. (Reference: Y.J. Li, W.J. Huang, S.G. Sun, *Angew. Chem. Int. Ed.*, 2006, 45, 2537-2539.)

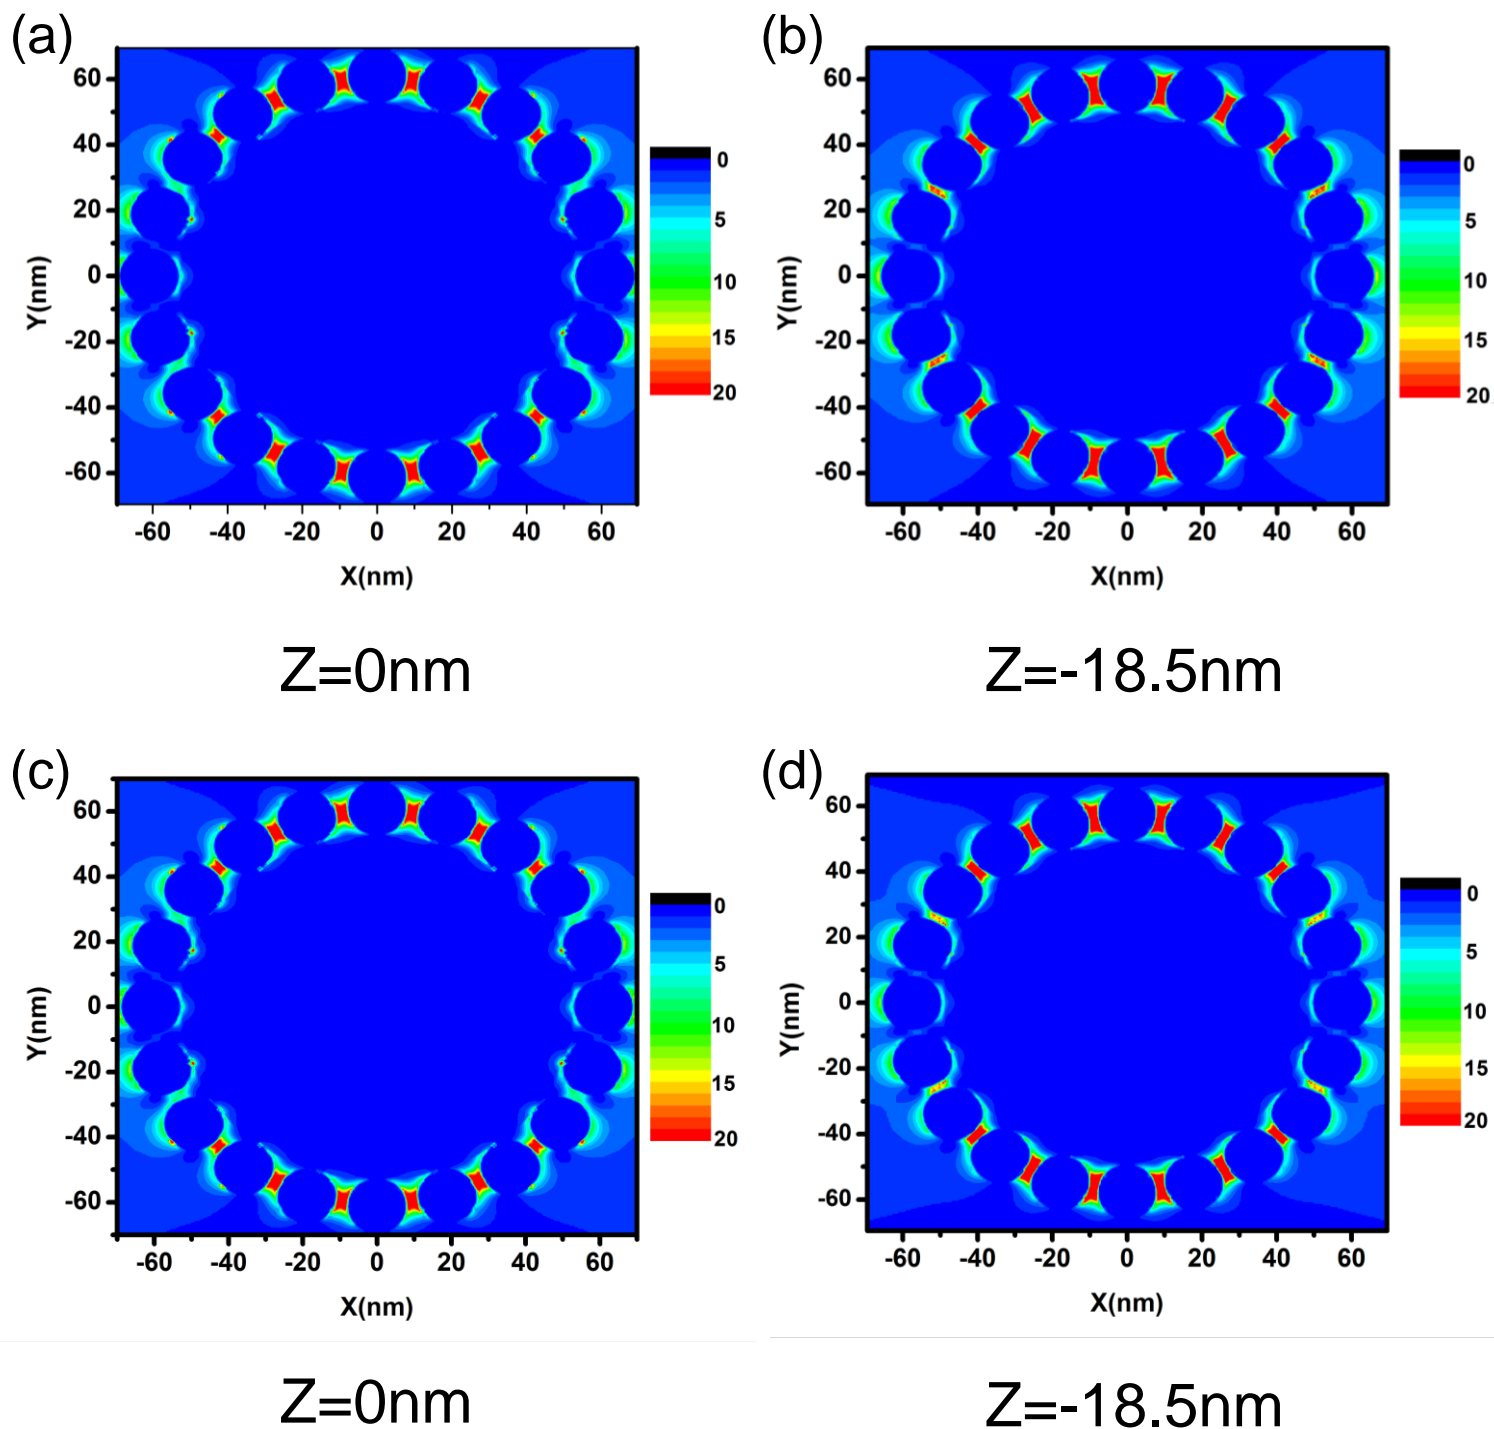

**Figure S7.** Simulated electromagnetic field distribution of the  $\text{Fe}_3\text{O}_4@Au$  NC at the x-y plane of  $z=0$  nm and  $z=-18.5$  nm in the aggregated status, respectively. a-b) Gap distance between NCs: 1 nm. c-d) Gap distance between NCs: 2 nm.
